# Supplementary material for: Prioritization of regulatory variants with tissue-specific function in the non-coding regions of human genome
Source: PubMed Central journal article supplement (PMC8754628; doi:10.1093/nar/gkab924), 2021-10-14
Supplement: gkab924_supplemental_file.pdf [file gkab924_supplemental_file.pdf]

## **Supplemental Materials**

for

### **Prioritization of regulatory variants with tissue-specific function in the non-coding regions of human genome**

Shengcheng Dong<sup>1</sup> and Alan P. Boyle<sup>1,2\*</sup>

1. Department of Computational Medicine and Bioinformatics, University of  
Michigan, Ann Arbor, MI
2. Department of Human Genetics, University of Michigan, Ann Arbor, MI

## Supplemental Tables

Supplemental Table S1. Number of allele specific TF binding (ASB) training SNVs in 6 cell lines.

| <b>Cell type name</b> | <b># of ASB SNVs</b> | <b># of control SNVs</b> |
|-----------------------|----------------------|--------------------------|
| GM12878               | 1,848                | 12,382                   |
| A549                  | 215                  | 1,357                    |
| H1hESC                | 1,464                | 6,525                    |
| HepG2                 | 2,717                | 24,479                   |
| K562                  | 767                  | 12,635                   |
| MCF7                  | 653                  | 8,034                    |

Supplemental Table S2. Feature list in random forest models of TURF.

| <b>Generic features</b>                                                                                                 |                     |
|-------------------------------------------------------------------------------------------------------------------------|---------------------|
| TF binding sites from ChIP-seq                                                                                          | Binary variable     |
| DNase I hypersensitive sites from DNase-seq                                                                             | Binary variable     |
| DNase footprints                                                                                                        | Binary variable     |
| DNase footprints with matched TF ChIP-seq peaks                                                                         | Binary variable     |
| TF motifs from PWM matching                                                                                             | Binary variable     |
| TF motifs from PWM matching with matched TF ChIP-seq peaks                                                              | Binary variable     |
| Information content change of two alleles in PWM matching                                                               | Numerical variable  |
| Information content change of two alleles in PWM matching with matched TF ChIP-seq peaks                                | Numerical variable  |
| eQTLs                                                                                                                   | Binary variable     |
| Quantiles (25%,50%,75% and 100%) and variance of ChIP-seq signals across all available ChIP-seq experiments from ENCODE | Numerical variables |
| Functional significance score from <i>DeepSEA</i>                                                                       | Numerical variable  |
| <b>Tissue-specific features (in final ensemble model)</b>                                                               |                     |
| H3K4me1 peaks from ChIP-seq                                                                                             | Binary variable     |
| H3K4me3 peaks from ChIP-seq                                                                                             | Binary variable     |
| H3K27ac peaks from ChIP-seq                                                                                             | Binary variable     |
| H3K36me3 peaks from ChIP-seq                                                                                            | Binary variable     |
| H3K27me3 peaks from ChIP-seq                                                                                            | Binary variable     |
| DNase I hypersensitive sites from DNase-seq                                                                             | Binary variable     |
| DNase footprints                                                                                                        | Binary variable     |

Supplemental Table S3. Feature importance of TURF generic scores. The importance is calculated based on mean decrease of impurity from the random forest model.

| <b>Feature name</b> | <b>Importance</b> |
|---------------------|-------------------|
| CHIP                | 0.124607          |
| DNASE               | 0.033935          |
| PWM                 | 0.018686          |
| FOOTPRINT           | 0.008609          |
| EQTL_2              | 0.004167          |
| PWM_matched         | 0.005055          |
| FOOTPRINT_matched   | 0.001454          |
| IC_change           | 0.050415          |
| IC_matched_change   | 0.021396          |
| funsig              | 0.122206          |
| ChIP_var            | 0.149313          |
| ChIP_max            | 0.167037          |
| ChIP_quantile1      | 0.097849          |
| ChIP_quantile2      | 0.090261          |
| ChIP_quantile3      | 0.105011          |

Supplemental Table S4. Comparison of performance on cell type-specific predictions for MPRA variants and ASB SNVs.

| <b>Method</b>                                  | <b>AUPR</b> | <b>AUROC</b> | <b>Correlation</b> |
|------------------------------------------------|-------------|--------------|--------------------|
| <b>Test on MPRA variants in E116 (GM12878)</b> |             |              |                    |
| TURF_Tissue-Specific                           | 0.548       | 0.731        | 0.450              |
| TURF_Generic                                   | 0.536       | 0.740        | 0.447              |
| GenoNet                                        | 0.536       | 0.723        | 0.442              |
| DeepSEA                                        | 0.451       | 0.671        | 0.115              |
| GenoSkyline                                    | 0.394       | 0.673        | 0.352              |
| CADD                                           | 0.240       | 0.566        | 0.082              |
| TURF_Ensemble<br>(trained from ASB SNVs)       | 0.484       | 0.724        | 0.393              |
| <b>Test on MPRA variants in E118 (HepG2)</b>   |             |              |                    |
| TURF_Tissue-Specific                           | 0.571       | 0.765        | 0.423              |
| TURF_Generic                                   | 0.502       | 0.733        | 0.372              |
| GenoNet                                        | 0.572       | 0.757        | 0.429              |
| DeepSEA                                        | 0.401       | 0.667        | 0.166              |
| GenoSkyline                                    | 0.326       | 0.628        | 0.225              |
| CADD                                           | 0.332       | 0.607        | 0.152              |
| TURF_Ensemble<br>(trained from ASB SNVs)       | 0.479       | 0.728        | 0.357              |
| <b>Test on MPRA variants in E123 (K562)</b>    |             |              |                    |
| TURF_Tissue-Specific                           | 0.441       | 0.681        | 0.344              |
| TURF_Generic                                   | 0.400       | 0.664        | 0.294              |
| GenoNet                                        | 0.420       | 0.706        | 0.340              |
| DeepSEA                                        | 0.290       | 0.607        | 0.099              |

|                                          |       |       |       |
|------------------------------------------|-------|-------|-------|
| GenoSkyline                              | 0.284 | 0.659 | 0.274 |
| CADD                                     | 0.212 | 0.539 | 0.046 |
| TURF_Ensemble<br>(trained from ASB SNVs) | 0.329 | 0.676 | 0.253 |

**Test on ASB SNVs in GM12878**

|                      |       |       |       |
|----------------------|-------|-------|-------|
| TURF_Ensemble        | 0.511 | 0.894 | 0.538 |
| TURF_Tissue-Specific | 0.510 | 0.882 | 0.537 |
| TURF_Generic         | 0.284 | 0.822 | 0.390 |
| GenoSkyline          | 0.246 | 0.743 | 0.340 |
| DeepSEA              | 0.222 | 0.688 | 0.190 |
| GenoNet              | 0.129 | 0.685 | 0.158 |

**Test on ASB SNVs in HepG2**

|                      |       |       |       |
|----------------------|-------|-------|-------|
| TURF_Ensemble        | 0.355 | 0.857 | 0.406 |
| TURF_Tissue-Specific | 0.353 | 0.831 | 0.401 |
| TURF_Generic         | 0.221 | 0.797 | 0.323 |
| DeepSEA              | 0.226 | 0.611 | 0.138 |
| GenoSkyline          | 0.212 | 0.582 | 0.133 |
| GenoNet              | 0.161 | 0.654 | 0.134 |

**Test on ASB SNVs in K562**

|                      |       |       |       |
|----------------------|-------|-------|-------|
| TURF_Ensemble        | 0.316 | 0.847 | 0.376 |
| TURF_Tissue-Specific | 0.313 | 0.815 | 0.366 |
| TURF_Generic         | 0.193 | 0.782 | 0.301 |
| GenoNet              | 0.140 | 0.644 | 0.113 |
| GenoSkyline          | 0.090 | 0.628 | 0.144 |
| DeepSEA              | 0.062 | 0.572 | 0.054 |

### Test on ASB SNVs in A549

|                      |       |       |       |
|----------------------|-------|-------|-------|
| TURF_Ensemble        | 0.313 | 0.872 | 0.369 |
| TURF_Tissue-Specific | 0.315 | 0.833 | 0.369 |
| TURF_Generic         | 0.158 | 0.796 | 0.256 |
| DeepSEA              | 0.052 | 0.760 | 0.119 |
| GenoNet              | 0.030 | 0.690 | 0.094 |
| GenoSkyline          | 0.022 | 0.632 | 0.049 |

### Supplemental Figures

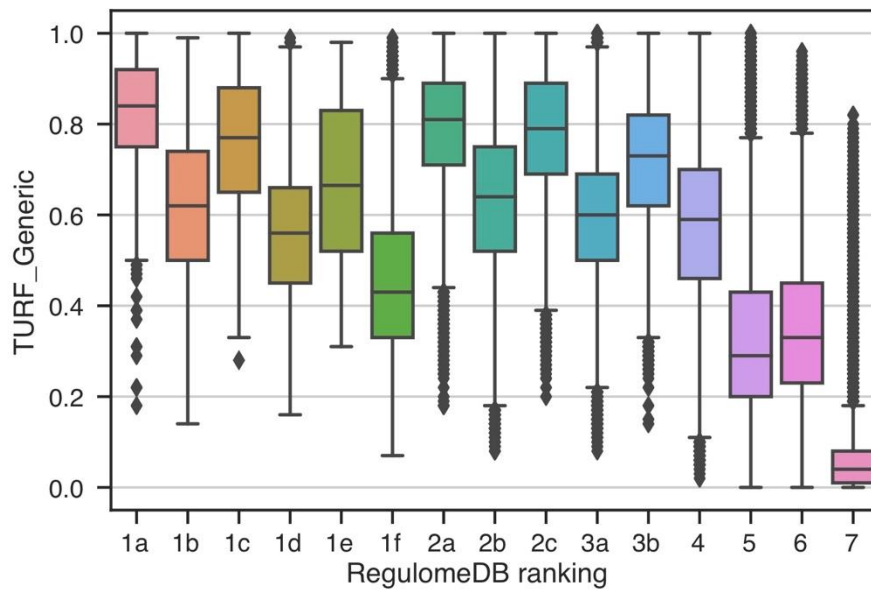

Supplemental Figure S1. Boxplot of TURF generic scores VS RegulomeDB ranking scores on 10,422,004 common SNVs from dbSNP153. X axis represents the original ranking scores from RegulomeDB v1.1, y axis represents the TURF generic scores from random forest model.

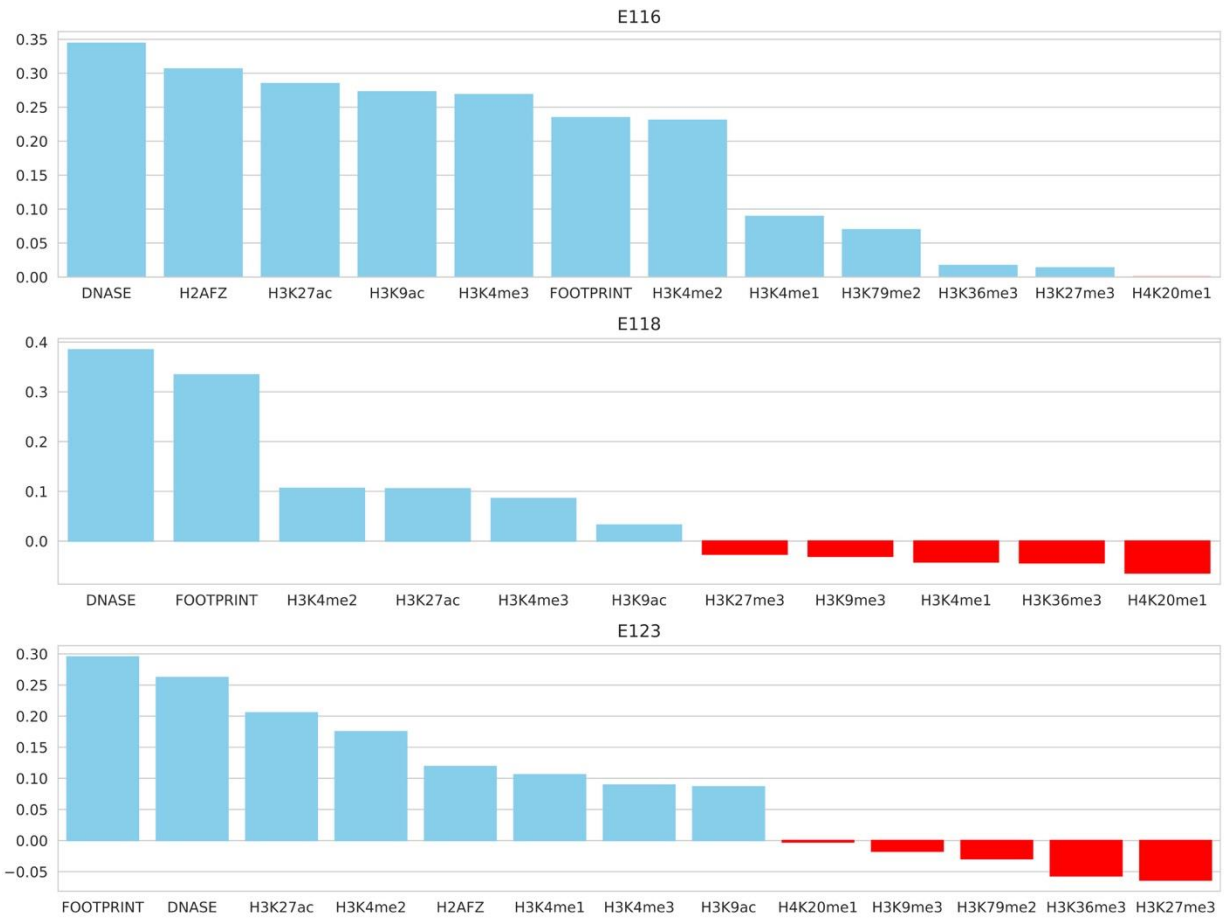

Supplemental Figure S2. Pearson correlation of labels and tissue-specific features in three MPRA datasets (E116: GM12878; E118: HepG2; E123: K562). Blue bars represent positive correlations while red bars represent negative correlations.



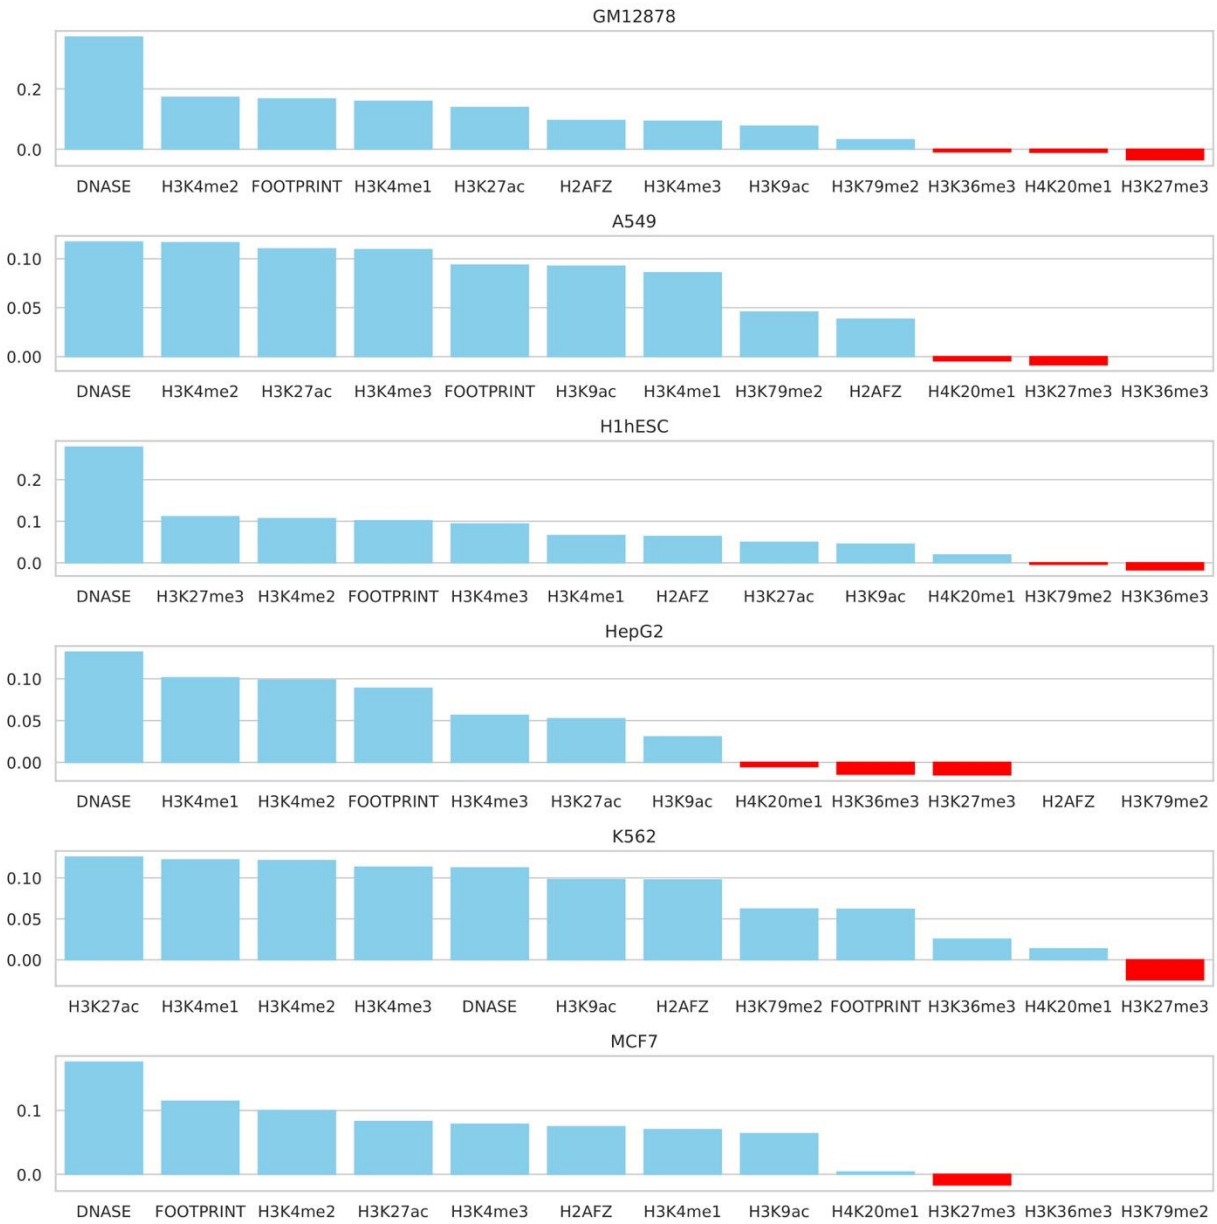

Supplementary Figure 3. Pearson correlation of labels and tissue-specific features in 6 ASB datasets. Blue bars represent positive correlations while red bars represent negative correlations.

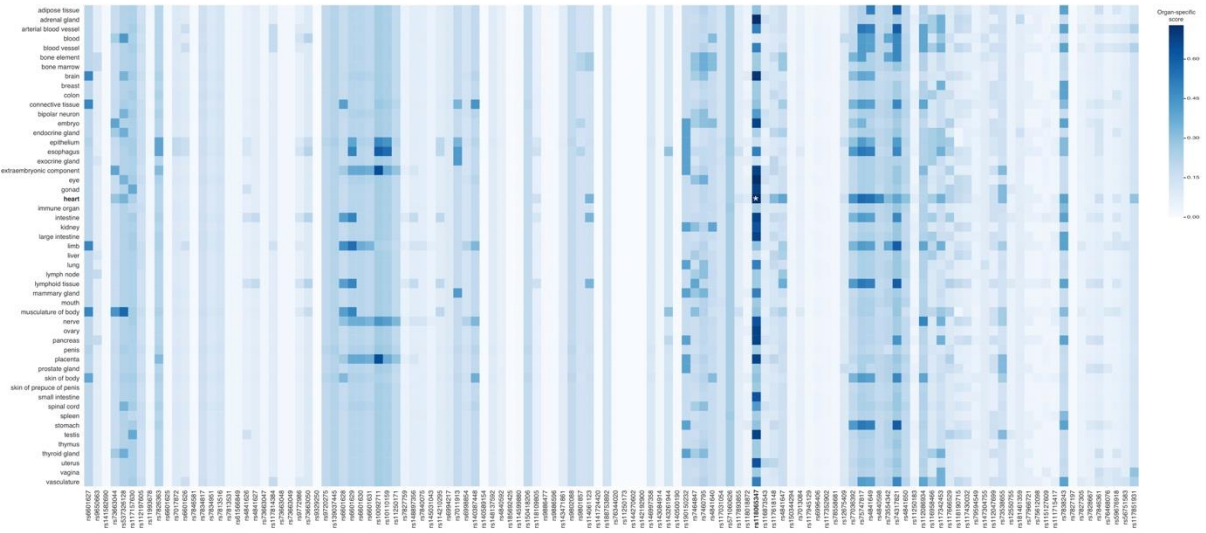

Supplemental Figure S4. Organ-specific scores of variants in the *GATA4* locus. rs118065347 has the top organ-specific score in heart compared to other candidate SNPs found through genome-wide association scan on bicuspid aortic valve cases. rs118065347 was shown to have heart-specific regulatory functionality from a previous study Yang et al. 2017.

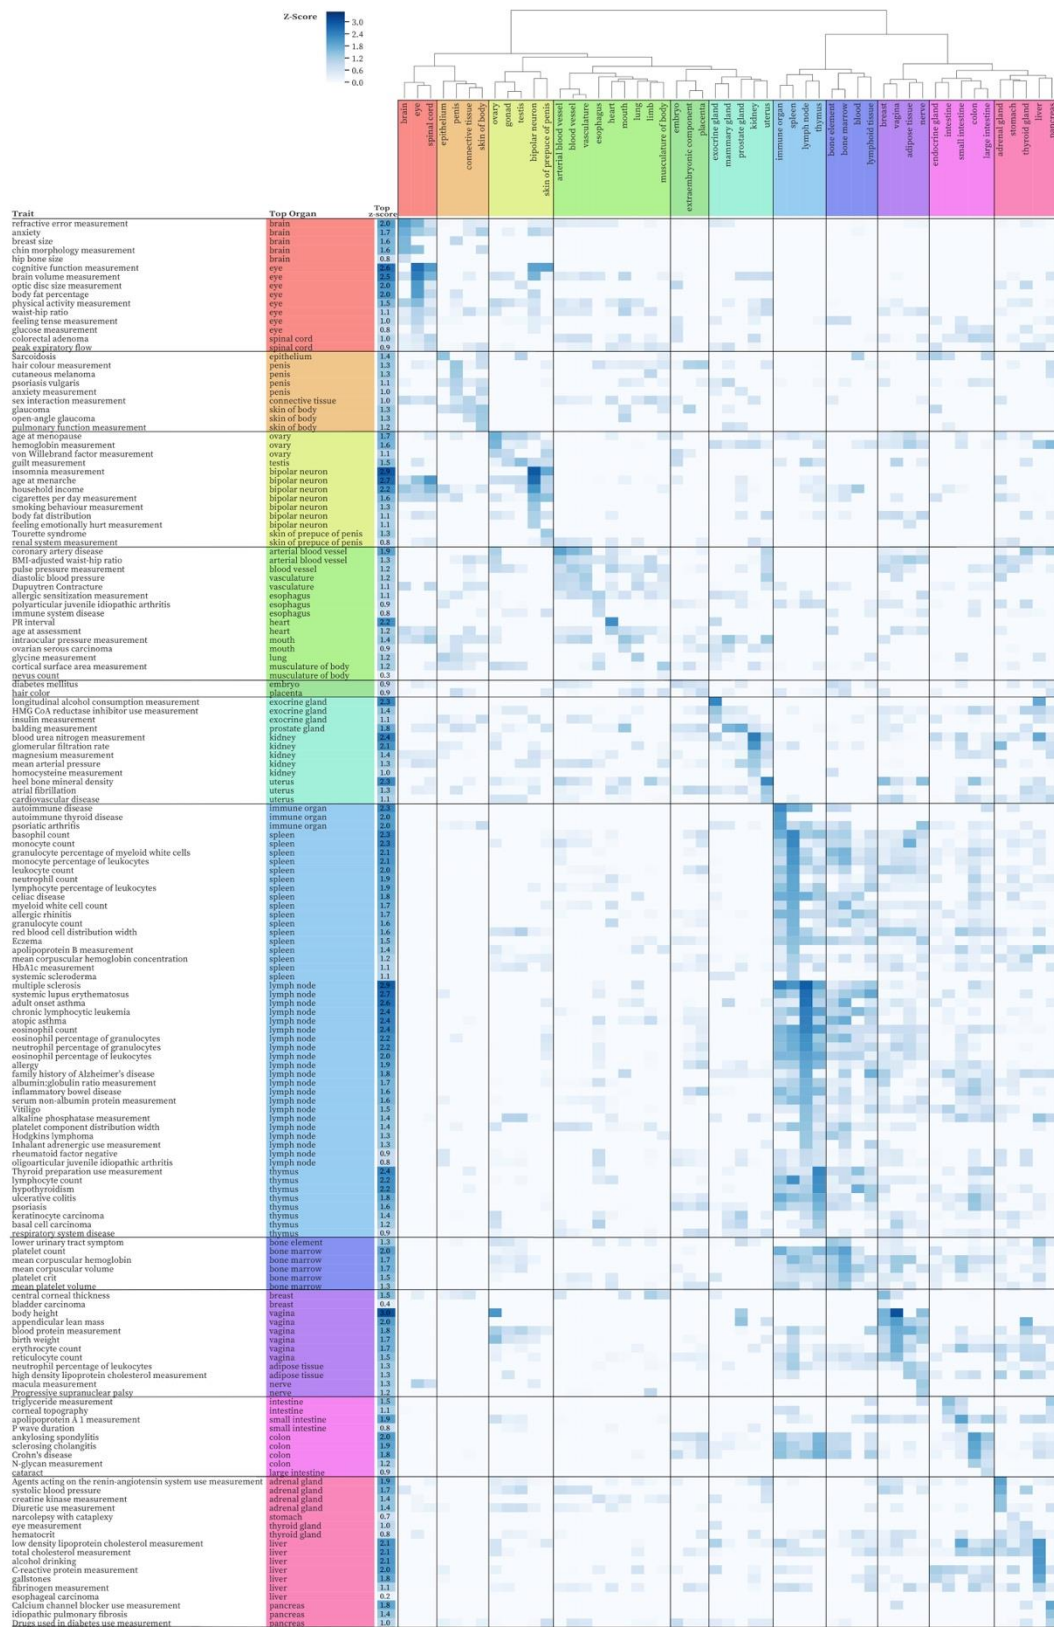

Supplemental Figure S5. Enrichment of regulatory variants with high organ-specific scores over variants associated with diverse traits. Only organ-trait pairs with z-scores higher than 0 and passing multiple test correction (FDR threshold of 5%) are shown.

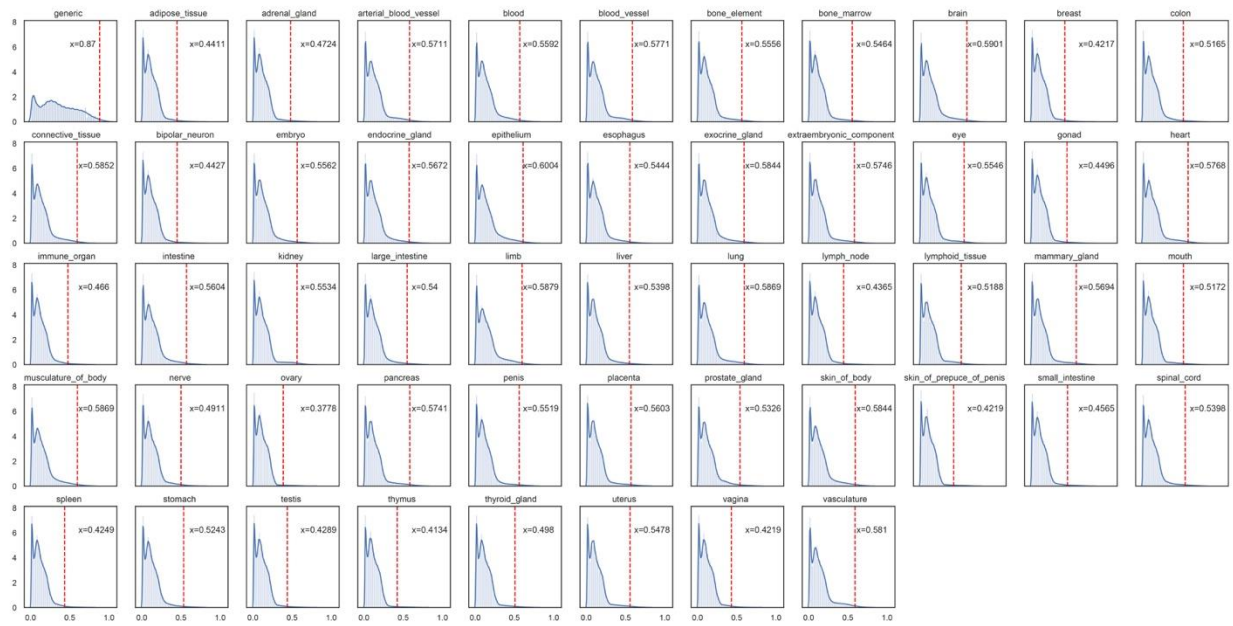

Supplemental Figure S6. Distribution of TURF generic and organ-specific scores on 3,102,261 GM12878 SNVs. The red vertical dashed line represents the 99<sup>th</sup> percentile score in each subplot.
